# Supplementary material for: Construction of machine learning-based models for cancer outcomes in low and lower-middle income countries: A scoping review
Source: Front Oncol. 2022 Dec 1;12:976168. doi: 10.3389/fonc.2022.976168 (PMC9751812; doi:10.3389/fonc.2022.976168)
Supplement: Supplementary file 2 [file Table_2.xlsx]

## Sheet: Sheet1
Author names by study	PROBAST domains
	Participants	Predictors	Outcome	Analysis
Aatresh et al (2021)	Unclear	High	Low	Low
Abdollahi et al (2018)	Low	Low	Low	High
Abdollahi et al (2018)	Low	Low	Low	High
Acharya et al (2021)	Unclear	High	Low	High
Agarwal et al (2022)	Low	Low	Low	High
Ahammed Muneer et al (2019)	Low	Low	Low	High
Ahmed et al (2016)	Unclear	High	Low	High
Al-Amin et al (2014)	Low	Low	Low	High
Al-Dhabyani et al (2019)	Low	Low	Low	High
Ali et al (2019)	Low	High	Low	Low
Allahloubi et al (2022)	Unclear	High	Low	High
Amin et al (2019)	Low	Low	Low	High
Amiri et al (2021)	Unclear	High	Low	High
Ara et al (2015)	Low	Low	Low	High
Asaduzzaman et al (2021)	Low	Low	Low	High
Assari et al (2022)	Low	High	Low	Low
Asuntha et al (2020)	Unclear	High	Low	High
Aswiga et al (2021)	Unclear	High	Low	High
Ayyad et al (2022)	Low	Low	Low	High
Babu et al (2021)	Unclear	High	Low	Low
Bal et al (2021)	Low	High	Low	Low
Ben Youssef et al (2017)	Low	High	Low	High
Bhowmik et al (2022)	Unclear	High	Low	High
Binson et al (2021a)	Unclear	High	Low	High
Buddhavarapu et al (2020)	Unclear	High	Low	Low
Bukhari et al (2020)	Unclear	High	Low	High
Butola et al (2019)	Unclear	High	Low	High
Ramkumar et al (2019)	Low	Low	Low	High
Joshi et al (2021)	Unclear	Low	High	High
Daoud et al (2019)	Unclear	High	Low	High
Das A et al (2019)	Low	High	Low	High
Das D et al (2021)	Low	Low	Low	Low
Das D.K et al (2017)	Low	Low	Low	High
Das N et al (2020)	Unclear	Low	Low	High
Dese et al (2021)	Unclear	High	Low	High
Devakumar et al (2021)	Low	High	Low	High
Dheeba et al (2017)	Low	High	Low	High
El Agouri et al (2022)	Low	Low	Low	Low
Fathi et al (2020)	Low	Low	Low	High
Fathi Kazeeroni et al (2020)	Low	Low	Low	High
Ferjaoui et al (2021)	Low	Low	Low	High
Figueroa et al (2022)	Low	Low	Low	High
Gangil et al (2022)	Low	High	Low	High
Gehlot et al (2021)	Low	High	Low	Low
Giri et al (2019)	Low	Low	Low	Low
Gnanasekeran et al (2020)	Low	High	Low	High
Gollapalli et al (2012)	Unclear	High	Low	High
Gupta et al (2021)	Low	High	Low	High
Hammouda et al (2021)	Low	Low	Low	High
Hashem et al (2020)	Low	Low	Low	High
Holmstrom et al (2021)	Unclear	High	Low	High
Hussein et al (2020)	Low	Low	Low	High
Jajodia et al (2020)	Unclear	High	Low	High
Jajroudi et al (2022)	Low	Low	Low	High
James et al (2021)	Low	Low	Low	High
Jha et al (2022)	Unclear	High	High	Unclear
Kakileti et al and Singh et al (2020, 2021)	Low	Low	Low	Low
Kamath et al (2007)	Low	Low	Low	High
Kamath et al (2011)	Low	High	Low	High
Kansal et al (2020)	Low	Low	Low	High
Kashef et al (2020)	Low	Low	Low	High
Kaur I et al (2020)	Low	Low	Low	High
Kaur I et al (2021)	Low	Low	Low	High
Kaur R et al (2021)	Unclear	High	Low	High
Kaushik et al (2021)	Low	Low	Low	High
Kayal et al (2020)	Low	Low	High	Unclear
Khan et al (2019)	Unclear	High	Low	Low
Kudva et al (2020)	Low	High	Low	High
Lotfnezhad Afshar et al (2021)	Low	Low	High	High
Macaulay et al (2021)	Low	High	Low	High
Mahanta et al (2021)	Unclear	High	Low	High
Mahmood et al (2020)	Low	High	Low	High
Mahmood et al (2022)	Low	Low	Low	High
Majumder et al (2015)	Low	Low	Low	High
Majumder et al (2005)	Unclear	High	Low	High
Malek et al (2019)	Low	High	Low	High
Malek et al (2020)	Low	High	Low	High
Mathialagan et al (2021)	Low	Low	Low	High
Mohamad (2021)	Low	Low	Low	High
Mohebian et al (2017)	Low	Low	Low	High
Mokni et al (2021)	Low	High	Low	High
Montazeri et al (2016)	Unclear	High	Low	High
Mostafaei et al (2020)	Unclear	Low	Low	High
Mungle et al (2017)	Unclear	Low	Low	High
Nachimuthu et al (2014)	Unclear	High	Low	High
Naeem et al (2020)	Unclear	High	Low	Low
Nanditha et al (2021)	Unclear	High	High	Low
Nassar et al (2021)	Low	High	Low	High
Naushad et al (2019)	Unclear	High	Unclear	High
Nawandhar et al (2020)	Unclear	High	Low	High
Nayak et al (2019)	Low	High	Low	High
Negahbani et al (2021)	Unclear	High	Low	High
Nisa et al (2022)	Low	Low	Low	High
Panigrahi et al (2022)	Low	High	Low	High
Paul et al (2020)	Low	Low	Low	High
Paydar et al (2016)	Low	High	Low	High
Punithavathy et al (2019)	Low	High	Low	Low
Rahman et al (2020)	Low	Low	Low	High
Ranjith et al (2015)	Low	Low	Low	High
Rashmi et al (2021)	Low	Low	Low	High
Reda et al (2017)	Low	Low	Low	High
Reda et al (2018)	Low	High	Low	High
Rehman et al (2018)	Low	High	Low	High
Rehman et al (2022)	Low	Low	Low	High
Sadewo et al (2020)	Low	Low	Low	High
Saha et al (2017)	Unclear	High	Low	Low
Saikia et al (2019)	Low	High	Low	High
Samuri et al (2022)	Unclear	High	Low	High
Sanyal et al (2019)	Low	High	Low	High
Sathya et al (2013)	Low	High	Low	High
Savala et al (2018)	Unclear	High	Low	High
Sengupta et al (2019)	Low	Low	Low	High
Sengupta et al (2020)	Unclear	High	Unclear	Unclear
Sepandi et al (2018)	Unclear	Low	Low	High
Shaban et al (2019)	Unclear	High	Low	High
Shaikh et al (2020)	Low	High	Low	High
Sharafeldeen et al (2022)	Low	High	Low	High
Shayesteh et al (2019)	Low	High	Low	High
Shayesteh et al (2021)	Unclear	High	Low	High
Shehata et al (2021)	Unclear	High	Unclear	High
Shukla et al (2018)	Unclear	High	Low	High
Singh et al (2017)	High	Low	Low	High
Singh et al (2021)	Low	Low	Low	High
Subbaiah et al (2014)	Low	Low	Low	High
Tapak et al (2019)	Low	Low	Low	High
Tekchandani et al (2022)	Low	Unclear	Unclear	High
Tewary et al (2017)	Low	Low	Low	High
Thakran et al (2022)	Unclear	High	Low	High
Tomas et al (2022)	Low	High	Low	High
Torkaman et al (2011)	Unclear	High	Low	High
Vaka et al (2020)	Unclear	High	Low	High
Vazifehdan et al (2019)	Low	Low	Low	High
Zadeh et al (2012)	Unclear	High	Low	High
